# Supplementary material
Source: Springer Nature journal article supplement (https://www.springermedizin.de/resource/supplementary/13024_2009_581_MOESM1_ESM.pdf/9643422)

SH-SY5Y

A

H & E

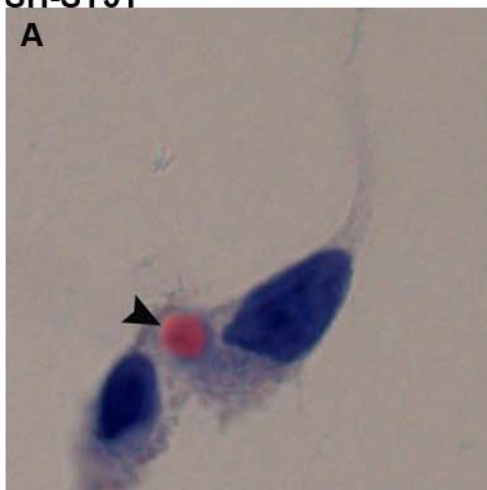

CHME-5

B

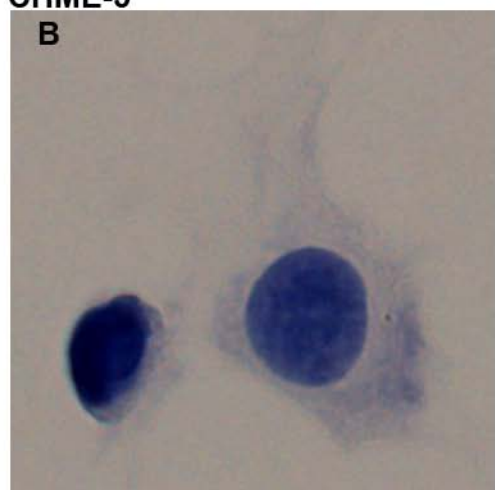

C

$\alpha$ -synuclein

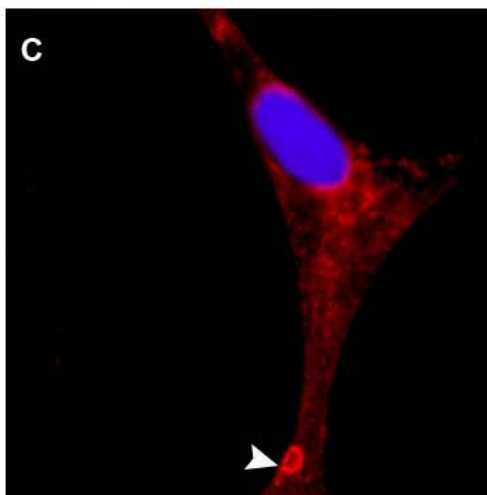

D

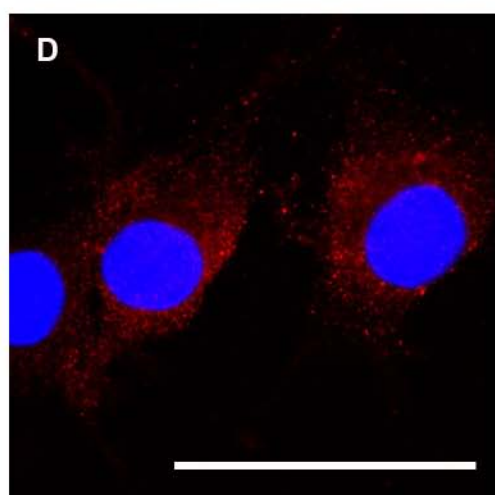

E

Ubiquitin

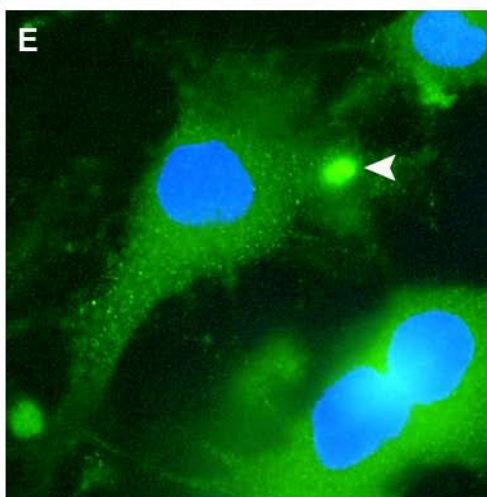

F

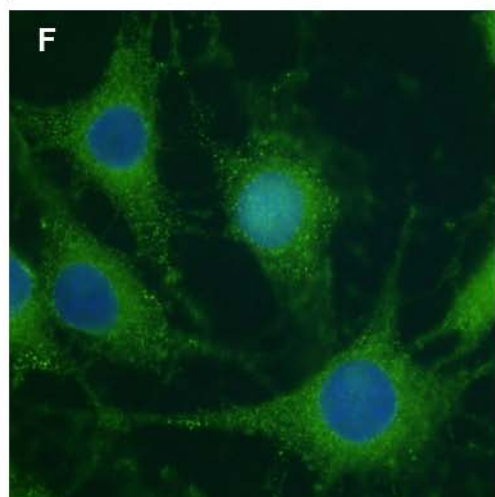

Supplement: MOESM1 [file 9643422]
